# Supplementary material
Source: Research Square preprint supplement (doi:10.21203/rs.3.rs-9495516/v1)
Supplement: Supplementary file 1 [file 5ec826ae1c2e5a1ad3cba5c3.docx]

**Table 2** Locations and descriptions characteristics of the sampled dandelion populations in Skåne.

**Table 4** Single Nucleotide Polymorphisms (SNPs) and flanking sequences that were used for the design of the KASP markers (between square brackets, in bold). The first nucleotide at the SNP is TKS-specific; the second nucleotide is TO-specific. cDNA clones of TKS are given.

| CPT1 | GAGCCCGTAAGGATTGCTGCTGAGAAGGCCATGGAAGCCACCGCTAAAAA[**C/T**]TCAACCACGTATCTCCTCGTATGTGTTGCTTACACTTCTTCCCATGAAAT |
| --- | --- |
| RTA | CTTTGTTCGYGAGATCTTACGTGGAATTGAAARCTATCTTATAATAAATG[**A/G**]AATTGTGAAAACATATGAAGATCTGAATTTAAACAGAGTGAAATATCTTG |
| SRPP5 | TGTTAAATAAGTTATGAGCGATTGTTTGGATTCTTATGATMTTTTCATGA[**G/T**]CGACTGTGTGCAAATTTCATCCAATAATCTATGTGAACGCTCTTACTTGT |
| REF | ATTATGCAGGCTAAGGTCGAGAATGGATCTACAAAATCTAAATTGTTAGA[**C/G**]CTTTTGAAGAAAATTTTCGCGGTATATTTGGCATTAGTCACGAGYGTGTT |
| CTO_M1_Contig179_397 / TKN060F01 | GCTGATGTTATCCTCAAGTACATGCCTGACGAGGCCAGGCTCTTGAAGGCTTACGGTGAGTTGCCAGAGAATATTAGGCT[**C/T**]AATGAAGGTATCGCTGGTGGACTTGATGAGGAGGATGATAACGCCGGTGATGATTACATTGAGTTTGAAGATGAAGACAT |
| CTO_M1_Contig2608_372 / TKN023D01 | TTGTTTACTATGACAGTAAGATCACTGGGAAGCTCAACGTCGGATCGATTACTAATTTGGATGGGATCCAAGTAAAAAGG[**C/T**]TCTTGTTCTGGTTTGATGTTGATGAAATTAGGGTTGACTTGCCAAGTTCCGATAACATCTACTTCACTGTTGGGATTATC |
| CTO_M1_Contig3593_566 / TKN082D08 | TAAAAGCCCTCATTGTCCAGGGTTTATTGAGATTGAAAGAACCTTCAGTGTTAATGAGATGTCGAAAAGAAGACTTGCAA[**T/A**]TGGTGGAATCAGTTGTGAATGATGCAAAAGCAGAATATGCAGAGAAAGCAGGTGTTCATGAACCTGAAGTTGTTATTGAC |
| CTO_M1_Contig5704_271 / TKN081H07 | ACATCGGGAAACGAATTAGGCAGCTTTTCAACAGTAGTCAGGAGACATCAATTCCTATTAACTGCACTTGCACTTCTTGT[**T/A**]GTCCTGTGCACTATTTACCTCTACTTCGCCATTACTTTAGGGGCGGCTGCTGATGTCTGTATGGGTTTGACTGGATCACA |
| CTO_M1_Contig6303_344 / TKR017D04 | TTGTTCTTGTACATCTCTGTCTTGACGGTGATGGGTGTCGTTAAATCTCCCACAAAGTGCGGTACTGTTGGCATTCAAGG[**G/A**]ATTGCTTGGGCTTTTGGGGGTATGATTTTTGCCCTCGTCTACTGTACCGCCGGTATCTCAGGAGGACACATCAACCCAGC |
| CTO_M1_Contig6322_430 / TKN002H01 | TTTTGTGTTTTCATGTAATAAATAAAGAAGAAACCTATATGTGGTATTTGGATTTGTAATGGGGTTTCCATGGCTGTTTT[**T/A**]TATTGGTGTAAAGTCAACTCTTTGAAATTTGAATTGTTTGGGTCTTTATTAATGCTTGATAGATGTATATTTGAATGAAT |

**Table 5** Multilocus KASP genotypes at two locations where TKS (yellow) growths together with closely related congeners. At location A (upper panel above the blank row) TKS grows together with an unidentified apomict. At location B TKS grows together with *T. brevicorniculatum* (TBR). Red shading = AA homozygotes, blue shading = BB homozygotes, green shading = AB heterozygotes, unshaded cells with U = unknown due to dropouts.

| **Plant** | **Tentative *a priori* identity** | **Breeding system** | **CPT1** | **RTA** | **SRPP5** | **REF** | CTO_M1_Contig179_397 | CTO_M1_Contig2608_372 | CTO_M1_Contig3593_566 | CTO_M1_Contig5704_271 | CTO_M1_Contig6303_344 | CTO_M1_Contig6322_430 |
| --- | --- | --- | --- | --- | --- | --- | --- | --- | --- | --- | --- | --- |
| **KAZ 57/1** | 3x ? | apo | **BB** | **BB** | **BB** | **AB** | **BB** | **AB** | **BB** | **BB** | **BB** | **BB** |
| **KAZ 57/3** | 3x ? | apo | **BB** | **BB** | **BB** | **AB** | **BB** | **AB** | **BB** | **BB** | **BB** | **BB** |
| **KAZ 57/4** | 3x ? | apo | **AB** | **AB** | **AB** | **AB** | **AB** | **AB** | **AB** | **AB** | **AB** | **AB** |
| **KAZ 57/7** | 3x ? | apo | **BB** | **BB** | **BB** | **AB** | **BB** | **AB** | **BB** | **BB** | **BB** | **BB** |
| **KAZ 57/8** | 3x ? | apo | **BB** | **BB** | **BB** | **AB** | **BB** | **AB** | **BB** | **BB** | **BB** | **BB** |
| **KAZ 57/9** | 3x ? | apo | **BB** | **BB** | **BB** | **AB** | **BB** | **AB** | **BB** | **BB** | **BB** | **BB** |
| **KAZ 57/10** | 3x ? | apo | **BB** | **BB** | **BB** | **AB** | **BB** | **AB** | **BB** | **BB** | **BB** | **BB** |
| **KAZ 57/11** | 3x ? | apo | **AB** | **AB** | **AB** | **AB** | **AB** | **AB** | **AB** | **AB** | **AB** | **AB** |
| **KAZ 57/12** | 3x ? | apo | **AB** | **AB** | **AB** | **AB** | **AB** | **AB** | **AB** | **AB** | **AB** | **AB** |
| **KAZ 58/1** | 3x ? | apo | **AB** | **AB** | **AB** | **AB** | **AB** | **AB** | **AB** | **AB** | **AB** | **AB** |
| **KAZ 58/2** | 3x ? | apo | **AB** | **AB** | **AB** | **AB** | **AB** | **AB** | **AB** | **AB** | **AB** | **AB** |
| **KAZ 59/1** | TKS | sex | **AA** | **AA** | **AA** | **AB** | **AA** | **AA** | **AA** | **AA** | **AA** | **AA** |
| **KAZ 59/2** | TKS | sex | **AA** | **AA** | **AA** | **AB** | **AA** | **AA** | **AA** | **AA** | **AA** | **AA** |
|  |  |  |  |  |  |  |  |  |  |  |  |  |
| **KAZ 61/1** | TKS | sex | **AA** | **AA** | **AA** | **AA** | **AA** | **AA** | **AA** | **AA** | **AA** | **AA** |
| **KAZ 61/4** | TKS | sex | **AA** | **AA** | **AA** | **AB** | **AA** | **AA** | **U** | **AA** | **AA** | **AA** |
| **KAZ 61/5** | TKS | sex | **AA** | **AA** | **AA** | **AB** | **AA** | **AA** | **AA** | **AA** | **AA** | **AA** |
| **KAZ 61/6** | TKS | sex | **AA** | **AA** | **AA** | **AB** | **AA** | **AA** | **AA** | **AA** | **AA** | **AA** |
| **KAZ 62/1** | TBR | apo | **AB** | **AB** | **AB** | **AB** | **AB** | **AB** | **AB** | **AB** | **AB** | **AB** |
| **KAZ 62/2** | TBR | apo | **AB** | **AB** | **AB** | **AB** | **AB** | **AB** | **AB** | **AB** | **AB** | **AB** |
| **KAZ 63/1** | TBR | apo | **U** | **U** | **U** | **U** | **AB** | **AB** | **AB** | **AB** | **AB** | **AB** |
| **KAZ 63/2** | TBR | apo | **AB** | **AB** | **AB** | **AB** | **AB** | **AB** | **AB** | **AB** | **AB** | **AB** |
| **KAZ 63/3** | TBR | apo | **AB** | **BB** | **BB** | **BB** | **BB** | **BB** | **BB** | **AB** | **BB** | **AB** |
| **KAZ 63/5** | TBR | apo | **AB** | **AB** | **AB** | **AB** | **AB** | **AB** | **AB** | **AB** | **AB** | **AB** |
| **KAZ 63/7** | TBR | apo | **AB** | **AB** | **AB** | **AB** | **AB** | **AB** | **AB** | **AB** | **AB** | **AB** |
| **KAZ 63/8** | TBR | apo | **AB** | **AB** | **AB** | **AB** | **AB** | **AB** | **AB** | **AB** | **AB** | **AB** |
| **KAZ 64/1** | ? hybr. | sex | **AA** | **AA** | **AA** | **AB** | **AA** | **AA** | **AA** | **AA** | **AA** | **AA** |
| **control A** | TKS | sex | **AA** | **AA** | **AA** | **AA** | **AA** | **AA** | **AA** | **AA** | **AA** | **AA** |
| **control B** | TO | sex | **BB** | **BB** | **BB** | **BB** | **BB** | **BB** | **BB** | **BB** | **BB** | **BB** |
| **control H** | F1 | sex | **AB** | **AB** | **AB** | **AB** | **AB** | **AB** | **AB** | **AB** | **AB** | **AB** |
